# Supplementary material
Source: PubMed Central journal article supplement (PMC11484892)
Supplement: NIHMS2025047-supplement-1.pdf [file NIHMS2025047-supplement-1.pdf]

## Supplementary Information

### 1. Choosing input features for developing OncoNPC

When choosing features for developing OncoNPC, it is important to acknowledge that CUP tumors often exhibit fundamentally different characteristics from known primaries, including stage, location/biopsy site, and pathological features. Including such characteristics specific to known primaries in the model may introduce a bias and potentially overconfident wrong predictions. Thus, we have chosen to prioritize the use of targeted panel sequencing data, which provides relatively unbiased and reliable biological signals about the tumors. Furthermore, targeted panel sequencing data is increasingly becoming a routine part of cancer care in many centers, which enhances the model’s translational potential.

Pathology findings can be important information for determining primary sites. However, inconsistent guidelines across cancer centers make it challenging to integrate them into the model [1]. Furthermore, for patients with CUP, only 25% of tumors have immunohistochemistry (IHC) results that indicate a single primary diagnosis [2]. This lack of consistency in guidelines, coupled with the subpar and uncertain performance of pathology in identifying primary sites for challenging tumors, can result in unreliable and inconsistent primary site predictions for CUP tumors.

With regards to patient demographics such as ethnicity and environmental variables, it has been demonstrated that these factors can improve disease predictions [3, 4]. However, it is crucial to exercise caution when including such factors in machine learning models, as they may lead to unwanted disparities in model outcomes across different patient subgroups [5]. While acknowledging the potential benefits of incorporating sensitive patient demographics and environmental variables in predicting cancer types and relevant clinical outcomes, we recognize that this is an area that requires further investigation. Thus, we leave it as a future work to study the effects of such variables.

### 2. Optimizing F1 scores across cancer types using varying prediction probability thresholds

Throughout our clinical analyses, we have utilized a fixed prediction probability threshold to identify tumor samples with a moderately high degree of confidence (e.g.,  $p_{\max} \geq 0.5$ ) in their primary cancer type predictions. However, an alternative approach is to use varying prediction probability thresholds for different cancer types, which achieves the best F1 score for each individual cancer type. In order to determine the optimal F1 score and corresponding prediction probability threshold for each cancer type, we conducted an analysis, which is illustrated in Supplementary Fig. S1a.

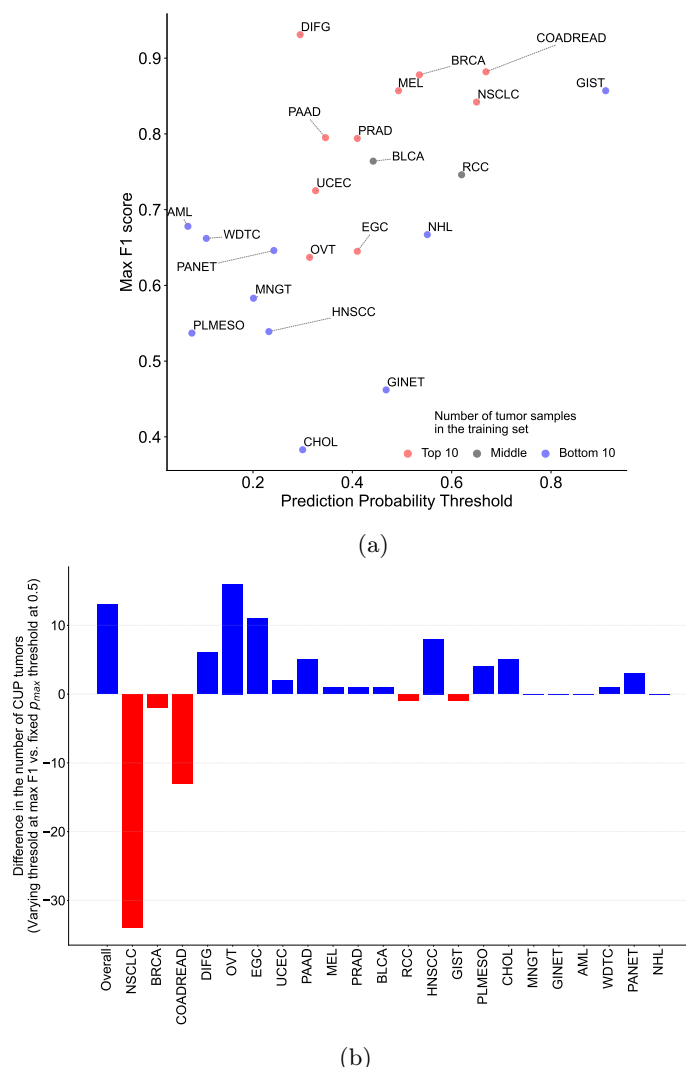

Figure S1: **Utilization of varying thresholds for prediction probabilities that maximizes the F1 score for each cancer.** (a) The scatter plot shows the maximum F1 score and the corresponding prediction probability threshold for each cancer type. The red dots correspond to the top 10 cancer types with the highest number of tumor samples in the training set, while the blue dots correspond to the bottom 10 cancer types. The gray dots correspond to all the other cancer types. (b) Impact of varying the threshold for achieving maximum F1 for each cancer on cancer type predictions for CUP tumors at the DFCl. We compared the number of CUP tumors across predicted cancer types, obtained by using varying prediction probability thresholds that optimize the F1 score for each cancer, with those obtained by using a fixed  $p_{\max}$  of 0.5 for all cancer types. The blue bars correspond to the increase in the number of tumors when using the varying threshold strategy, while the red bars correspond to the decrease in the number of tumors.

713 Our analysis indicates that the bottom 10 minority cancer types exhibit considerably lower  
 714 maximum F1 scores compared to the top 10 majority cancer types (F1 score 0.601 vs. 0.799), which  
 715 is consistent with the findings presented in Results: OncoNPC accurately classifies 22 known cancer  
 716 types. Additionally, the minority cancer types reached their maximum F1 scores at lower prediction

717 probability thresholds in comparison to the majority cancer types (prediction probability threshold  
718 0.316 vs. 0.445), suggesting that the predictions for the minority cancer types are generally less  
719 confident.

720 Furthermore, we investigated the impact of varying the threshold for achieving maximum F1  
721 for each cancer on cancer type predictions for CUP tumors at the DFCI. To do that, we compared  
722 the number of CUP tumors across predicted cancer types, obtained by using varying prediction  
723 probability thresholds that optimize the F1 score for each cancer, with those obtained by using a  
724 fixed  $p_{\max}$  of 0.5 for all cancer types (as it is used as the exclusion criterion in our CUP analyses;  
725 see Extended Data Fig. 6). In Supplementary Fig. S1b, we visualized the resulting differences in  
726 the number of CUP tumors across predicted cancer types. The blue bars correspond to the increase  
727 in the number of tumors when using the varying threshold strategy, while the red bars correspond  
728 to the decrease in the number of tumors.

729 Overall, using the varying threshold strategy resulted in an increase in the number of included  
730 CUP tumors from 798 to 811 (13 additional tumors included). Although there was a reduction in  
731 the number of included tumors for NSCLC, BRCA, and COADREAD predicted CUP tumors (with  
732 decreases of 34, 2, and 13 tumors, respectively), the overall increase was due to many other cancer  
733 types. Notably, OVT, EGC, and HNSCC were the top three contributors to the overall increase,  
734 with increases of 16, 11, and 8 tumors, respectively.

### 735 **3. OncoNPC performance under real-world dataset shifts and difficult-to-** 736 **predict cancers**

#### 737 **Real-world dataset shifts**

738 OncoNPC achieved robust performance against potential dataset shifts due to the factors includ-  
739 ing cancer center, biopsy site type, sequence panel version, and patient ethnicity (Main Fig. 2e).  
740 OncoNPC showed comparable performance, measured in area under the precision-recall curve (AUC-  
741 PR), for tumor samples from DFCI (AUC-PR = 0.893,  $n = 3,690$ ) and those from MSK (AUC-PR  
742 = 0.850,  $n = 3,331$ ). OncoNPC performance for those from VICC was slightly lower (AUC-PR =  
743 0.760,  $n = 268$ ). Refer to Extended Data Fig. 2a for more detailed center-specific OncoNPC perfor-  
744 mance. OncoNPC showed comparable performance for primary tumor samples (AUC-PR = 0.872,  $n$   
745 = 4,525) and metastatic tumor samples (AUC-PR = 0.869,  $n = 2,605$ ), demonstrating its capability  
746 to predict the primary cancer types of metastatic tumors without compromising its performance.  
747 Furthermore, as shown in Main Fig. 2e, we investigated its performance across sequence panel ver-  
748 sions utilized at DFCI. The OncoNPC performance on tumor samples from earlier versions of DFCI  
749 sequence panels (OncoPanel v1: AUC-PR = 0.821,  $n = 414$  and OncoPanel v2: AUC-PR = 0.887,  $n$   
750 = 1,050) was slightly lower than the performance on the tumor samples from the most recent panel  
751 (OncoPanel v3: AUC-PR = 0.907,  $n = 2,226$ ) which also contained the largest number of genes. As  
752 all tumor samples have been collected from OncoPanel v3 since October 2016, we expect our model  
753 to make high-quality predictions in a prospective setting. Finally, OncoNPC demonstrated reliable  
754 performance for all patient ethnicities, achieving an AUC-PR of over 0.8 for each ethnicity. However,  
755 the model performed better for white patients compared to other ethnicities (White: AUC-PR =

756 0.877, n = 6,035, Asian: AUC-PR = 0.812, n = 342, Other: AUC-PR = 0.834, n = 347, Black:  
757 AUC-PR = 0.844, n = 312, and Spanish/Hispanic: AUC-PR = 0.825, n = 253). This discrepancy in  
758 performance may be attributed to the fact that the training cohort predominantly consisted of white  
759 patients (83.2% White, 4.46% Asian, 4.78% Other, 4.27% Black, and 3.25% Spanish/Hispanic).

#### 760 **OncoPanel version variability on primary site predictions**

761 To investigate the impact of OncoPanel version variability during the model training on primary  
762 site predictions, we added 7 additional one-hot-encoded input features that represented different  
763 panel versions (3 versions at DFCI, 3 versions at MSK, and 2 versions at VICC). We then retrained  
764 the model and analyzed changes in performance and the proportion of predicted cancer types in  
765 held-out CKP and CUP tumor samples. Supplementary Fig. S2a shows the F1 score differences  
766 across 22 cancer types between the original OncoNPC model and the model with the panel features.  
767 Negative values in red indicate cases where the model with the panel features outperformed the  
768 original OncoNPC model, while positive values in blue indicate the opposite. Supplementary Fig.  
769 S2b shows the absolute differences in the proportions of 22 predicted cancer types in percentage  
770 between the original OncoNPC model and the new model in held-out CKP tumors (blue) and CUP  
771 tumors (green), respectively.

772 Regarding the changes in model performance, we observed only a negligible change in the overall  
773 F1 score when compared to the original OncoNPC model (weighted overall F1 difference of  $-3.68 \times$   
774  $10^{-4}$ ). However, we did observe larger performance changes for some minority cancer types, such  
775 as PLMESO (Pleural Mesothelioma), AML (Acute Myeloid Leukemia), and NHL (Non-Hodgkin  
776 Lymphoma) with a mean absolute difference in F1 score of 0.0491 among them. With regard to  
777 the proportion of predicted cancer types among CKP tumors and CUP tumors, we observed mean  
778 absolute differences in percentages of 0.0549% and 0.253%, respectively. Our findings suggest that  
779 incorporating the panel variability into the model training process has only minor effects on the  
780 model performance and predicted cancer types. Additionally, any resulting small changes are likely  
781 influenced by stochastic elements of the training process, such as weight initializations.

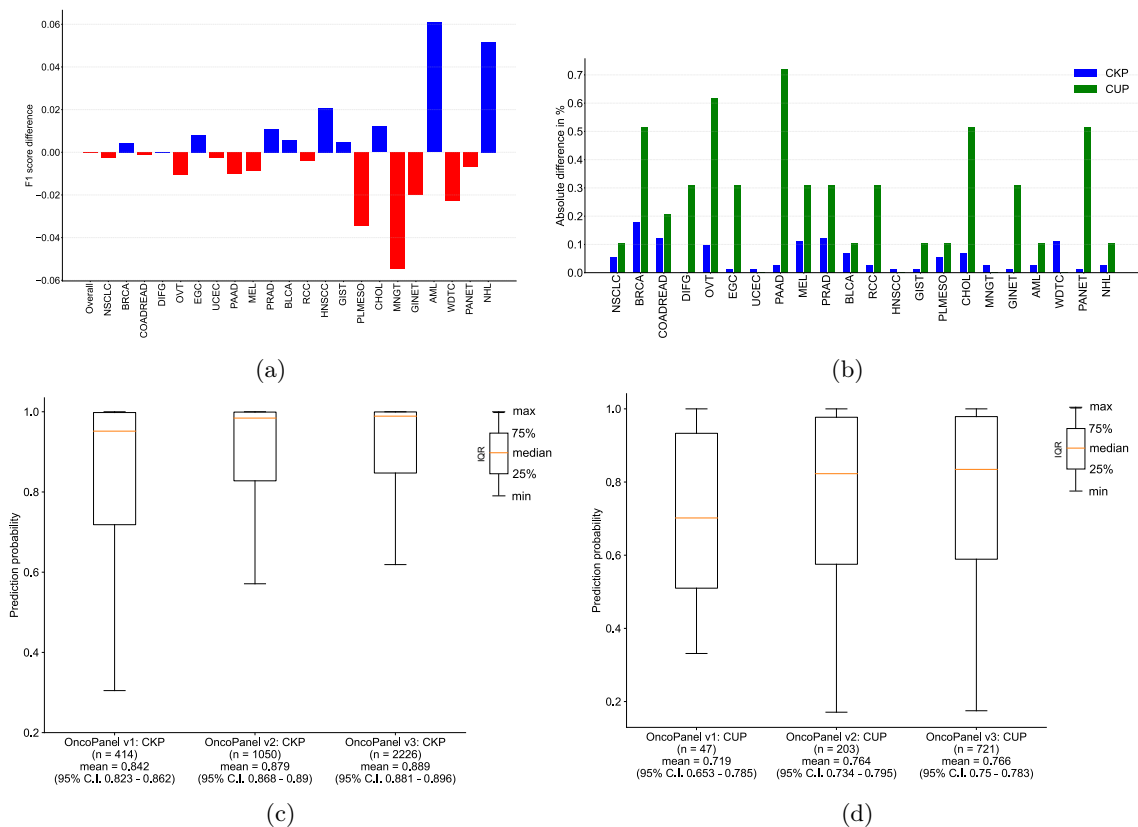

**Figure S2: OncoNPC performance with respect to sequencing panel variability.** We added 7 panel version features, retrained the model, and analyzed changes in performance and predicted cancer types in the held-out CKP and CUP tumor samples. **(a)** F1 score differences across 22 cancer types between the original OncoNPC model and the model with the panel features. Negative values in red indicate cases where the model with the panel features outperformed the original OncoNPC model, while positive values in blue indicate the opposite. We observed a negligible change in overall F1 score ( $-3.68 \times 10^{-4}$ ) compared to the original OncoNPC model. **(b)** Absolute differences in the proportions of 22 predicted cancer types in percentage between the original OncoNPC model and the new model in held-out CKP tumors (blue) and CUP tumors (green), respectively. For both **(a)** and **(b)**, the cancer types on the x-axis are sorted in a decreasing order of the number of tumor samples. We observed mean absolute differences in percentages of 0.0549% and 0.253% among CKP tumors and CUP tumors, respectively. The panel variability, when incorporated into the model training process, has only minor effects on the model performance and predicted cancer types. **(c)**, **(d)** Box plots comparing prediction confidences ( $p_{\max}$ ) across OncoPanel versions for **(c)** CKP tumors and **(d)** CUP tumors at DFCI. The figures show medians, lower and upper quartiles, as well as the mean and 95% confidence intervals, along with the number of tumor samples.

782 Regarding the impacts of OncoPanel versions on the prediction confidences, we have provided  
 783 box plots of the prediction confidences ( $p_{\max}$ ) of the final OncoNPC model for both CKP (Cancer  
 784 with Known Primary) tumors and CUP tumors across three different OncoPanel versions at DFCI,  
 785 as shown in Supplementary Fig. S2d and Supplementary Fig. S2c, respectively. For CKP tumors,  
 786 the prediction confidences of OncoPanel v1 sequenced tumors were significantly lower than those of  
 787 OncoPanel v2 and v3 sequenced tumors (with  $p_{\max}$  mean of 0.842 and 95% C.I. of 0.823 - 0.862

788 for OncoPanel v1, as compared to 0.879 and 95% C.I. of 0.868 - 0.890, and 0.889 and 95% C.I. of  
789 0.881 - 0.896 for OncoPanel v2 and v3, respectively). For CUP tumors, the prediction confidences  
790 of OncoPanel v1 sequenced tumors were not significantly different from those of OncoPanel v2 and  
791 v3 sequenced tumors (with  $p_{\max}$  mean of 0.719 and 95% C.I. of 0.653 - 0.785 for OncoPanel v1,  
792 as compared to 0.764 and 95% C.I. of 0.734 - 0.795, and 0.766 and 95% C.I. of 0.750 - 0.783 for  
793 OncoPanel v2 and v3, respectively). Finally, we want to highlight that OncoPanel v1, which targets  
794 the fewest genes compared to OncoPanel v2 and v3 (304 genes vs. 326 and 447 genes, respectively),  
795 only accounts for 10.2% of CKP tumors and 4.8% of CUP tumors. The vast majority of tumors  
796 at DFCI were sequenced using the latest version of the panel, OncoPanel v3 (representing 61.6% of  
797 CKP tumors and 74.3% of CUP tumors). We anticipate that this percentage will continue to rise  
798 as new tumor samples at DFCI are routinely sequenced with OncoPanel v3.

### 799 **Difficult-to-predict cancers**

800 Five cancer types with the lowest F1 were CHOL (0.368), GINET (0.436), PLMESO (0.479), HNSCC  
801 (0.500), and MNGT (0.545). Nevertheless, when samples were predicted with high confidence ( $p_{\max} \geq$   
802 0.9), the performance improved as shown in Extended Data Fig. 2a: CHOL (precision: 0.783, recall:  
803 0.500, F1: 0.610), GINET (precision: 1.00, recall: 0.478, F1: 0.647), PLMESO (precision: 0.765,  
804 recall: 0.684, F1: 0.722), HNSCC (precision: 0.818, recall: 0.692, F1: 0.750), and MNGT (precision:  
805 1.00, recall: 0.778, F1: 0.875). This demonstrates that the OncoNPC was still able to make high-  
806 quality predictions for a subset of tumor samples in rare cancer types, for which training data was  
807 limited.

808 We further investigated the factors underlying the suboptimal performance of relatively more  
809 common cancer types such as CHOL and HNSCC. As shown in the confusion matrix in Extended  
810 Data Fig. 1a, a sizable proportion of HNSCC and CHOL tumors were inaccurately classified as  
811 NSCLC (28 out of 134 HNSCC tumors and 26 out of 126 CHOL tumors). In order to gain insight  
812 into the OncoNPC's reasoning behind the misclassification of HSNCC and CHOL tumor samples  
813 as NSCLC, we selected a subset of samples ( $n = 14$  for HSNCC and  $n = 7$  for CHOL) that were  
814 mis-classified as NSCLC with a moderately high prediction probability (i.e.,  $p_{\max} \geq 0.5$ ). We then  
815 investigated the SHAP values for NSCLC in these samples, as illustrated in Supplementary Fig. S3,  
816 which shows the 15 most important features for each group based on the mean SHAP values. The  
817 features are plotted on the x-axis, and the corresponding mean SHAP values on the y-axis, with  
818 positive values (in blue) corresponding to features that favor the prediction towards NSCLC, and  
819 negative values (in red) corresponding to features that discourage the prediction towards NSCLC.

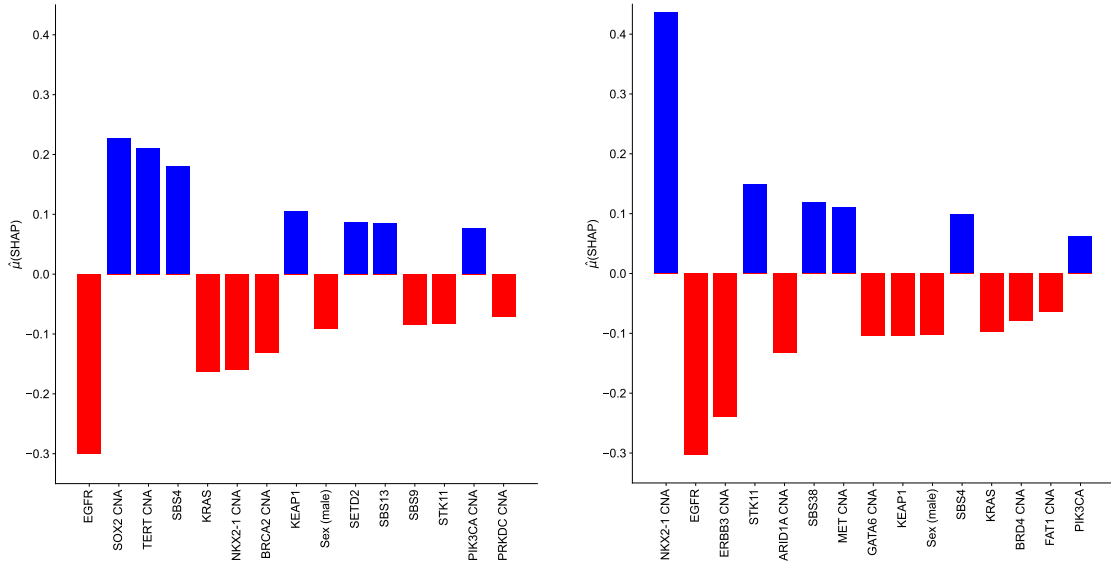

(a) HNSCC tumors (n = 14) classified as NSCLC (b) CHOL tumors (n = 7) classified as NSCLC

Figure S3: **Top 15 most important features for (a) HNSCC tumors and (b) CHOL tumors classified as NSCLC.** OncoNPC predicted these tumor samples as NSCLC with prediction probability  $\geq 0.5$ . On the y-axis, the mean SHAP values of each feature are plotted, with positive values (in blue) corresponding to features that favor the prediction towards NSCLC and negative values (in red) corresponding to features that discourage the prediction towards NSCLC. For HNSCC tumors, the key features for favoring the NSCLC prediction are copy number alterations (CNA) in the *SOX2* and *TERT* genes, as well as the tobacco smoking-related mutation signature SBS4. For CHOL tumors, key features include CNA in the *NKX2-1* gene, mutation in the *STK11* gene, and the mutation signature SBS38 (whose association is currently unknown). Notably, none of the tumor samples showed a mutation in *EGFR*.

820 Among the HNSCC tumors, the model relied heavily on copy number alterations (CNA) in the  
 821 *SOX2* and *TERT* genes, as well as the tobacco smoking-related mutation signature SBS4 to predict  
 822 NSCLC. Interestingly, the SBS4 mutation signature was significantly more enriched in the NSCLC-  
 823 classified HNSCC tumors compared to the rest of the HNSCC tumors (0.123 vs. 0.091). Upon  
 824 reviewing the patient charts, we discovered that the average pack-years of those 14 patients were  
 825 31, and only two of the tumors came from HPV-positive patients, indicating that smoking-related  
 826 signatures played a significant role in incorrect predictions, while HPV status played a minor role.

827 For CHOL tumors, key features included CNA in the *NKX2-1* gene, mutation in the *STK11* gene,  
 828 mutation signature SBS38 (currently unknown), and SBS4 (tobacco). The absence of *EGFR*/*KRAS*  
 829 mutations in these tumors negatively impacted the model's prediction (indicated by red bars), but  
 830 were outweighed by the other factors in these samples. For both cancer types, it thus appears that a  
 831 smoking signature together with some genomic hallmarks of NSCLC (*KEAP1*, *STK11*, and *PIK3CA*)  
 832 contributed to an NSCLC mis-classification in these samples (Main Fig. 3d and Supplementary Fig.  
 833 S10j). Notably, OncoNPC's interpretability allows us to delve deeper into the model's errors from a  
 834 clinical perspective for specific cases.

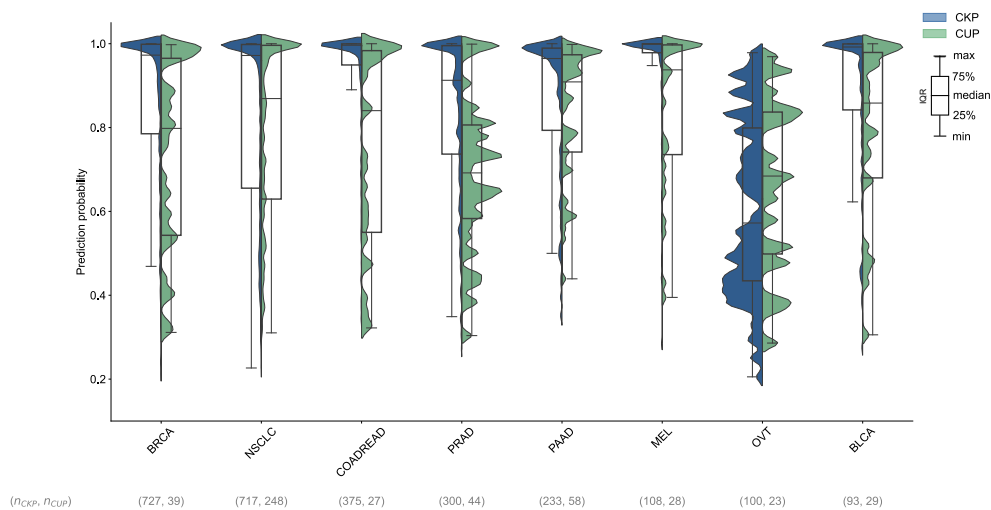

(a)

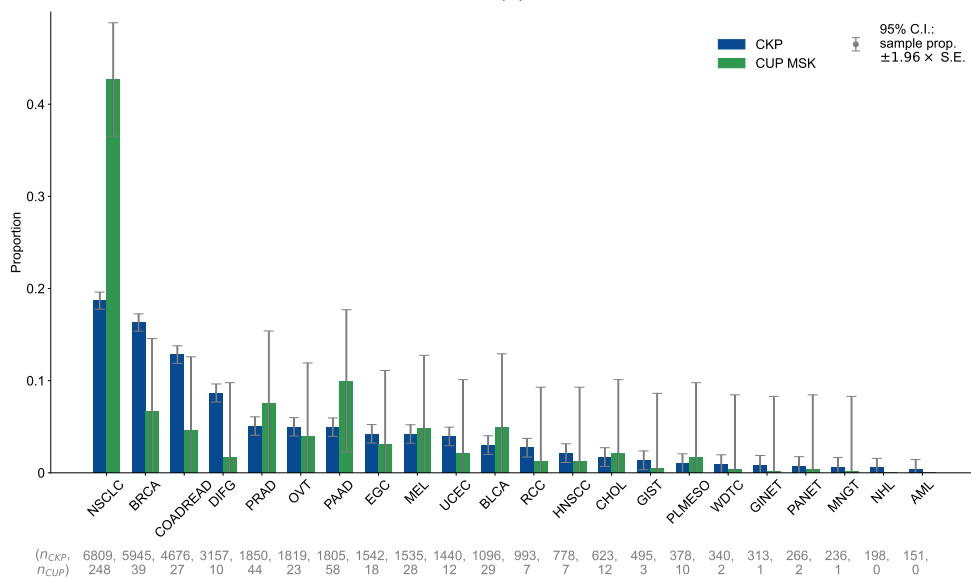

(b)

Figure S4: **Applying OncoNPC to MSK CUP tumor samples.** (a) Empirical distributions of prediction probabilities for correctly predicted held-out CKP tumor samples ( $n = 3,429$ ) and MSK CUP tumor samples ( $n = 496$ ), broken down by CKP cancer types (blue) and their corresponding OncoNPC predicted cancer types for CUP tumors (green). Only OncoNPC classifications with at least 20 CUP tumor samples are shown. (b) Proportion of each CKP cancer type and the corresponding OncoNPC predicted CUP cancer type. All training CKP tumor samples ( $n = 36,445$ ) and all MSK CUP tumor samples ( $n = 581$ ) are shown. For both (a) and (b), the cancer types (x-axis) are ordered by the number of CKP tumor samples in each cancer type



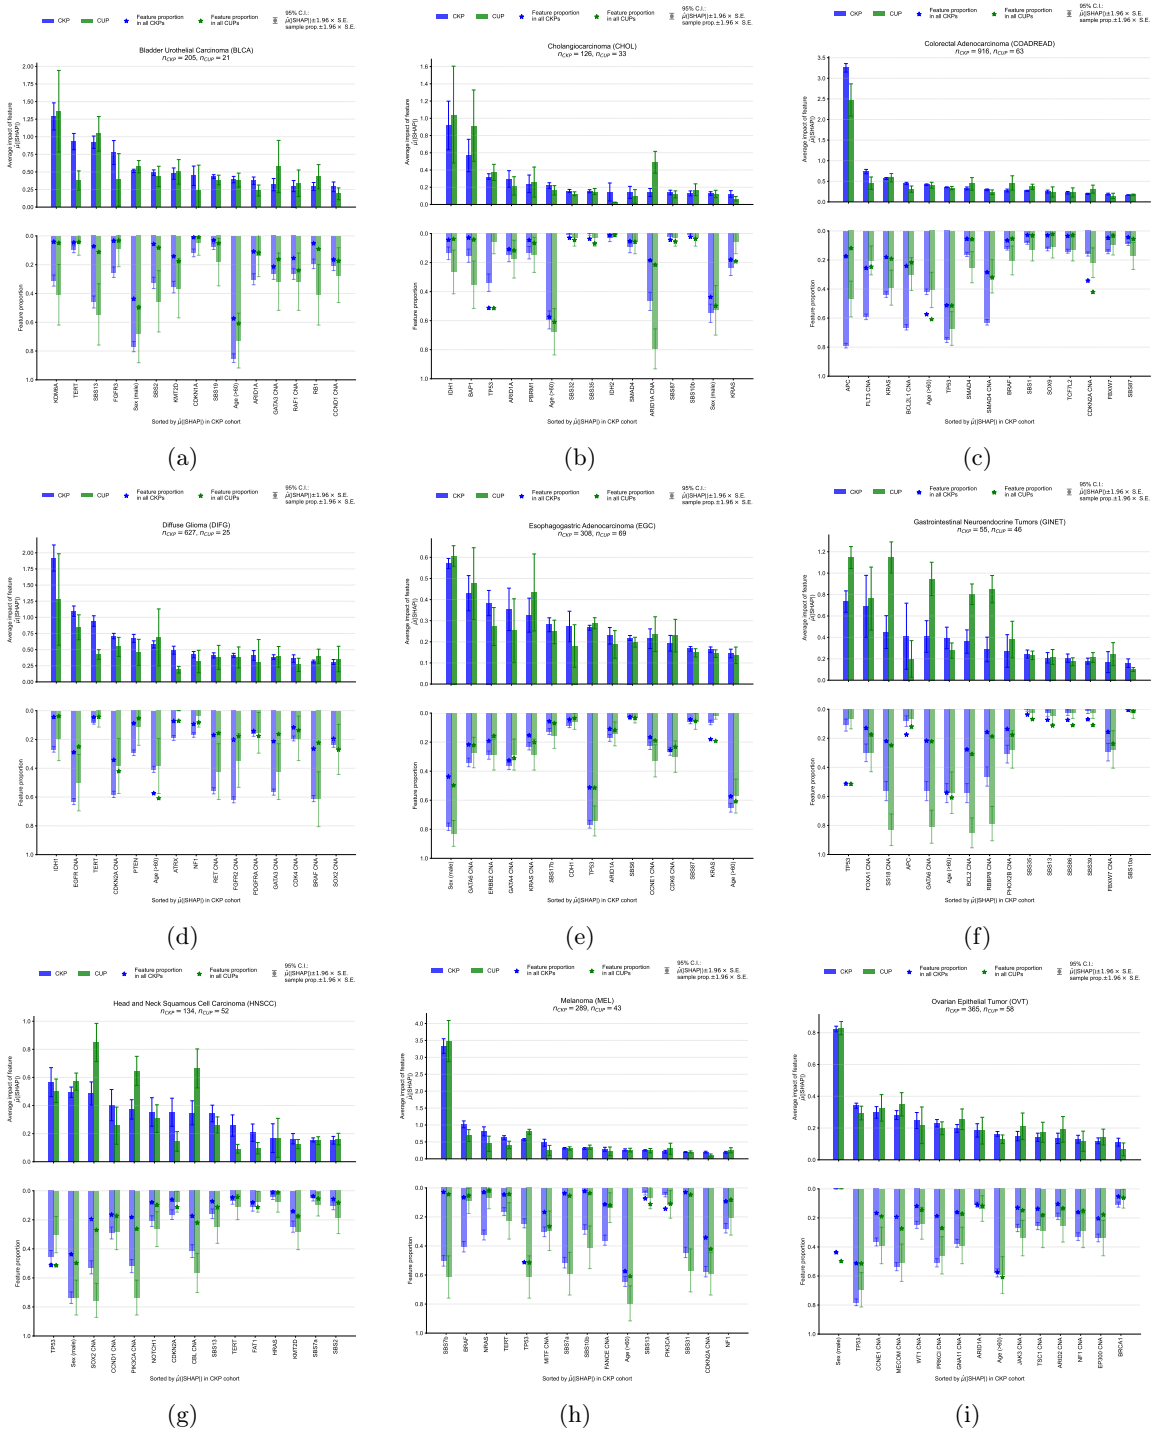

Figure S5

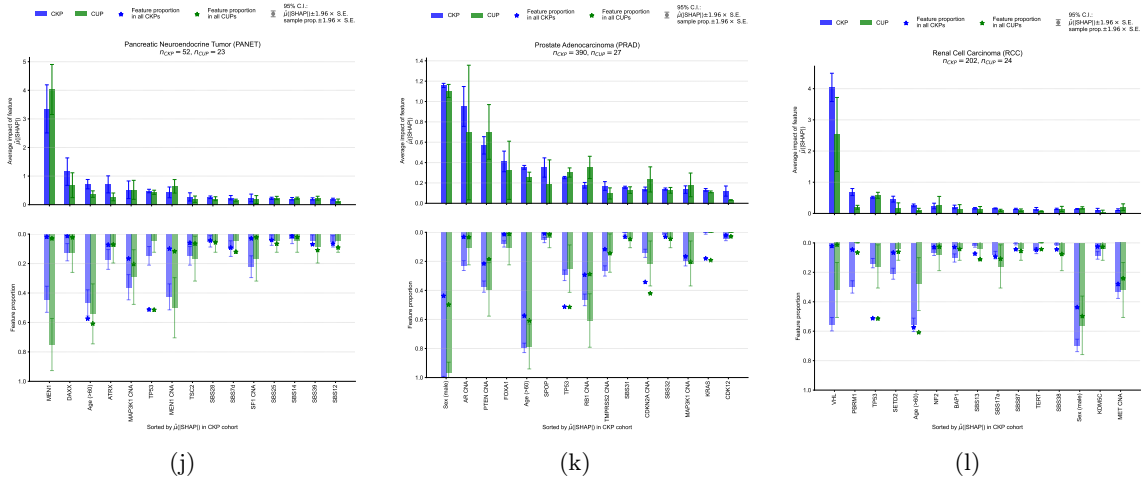

Figure S5: **Interpreting OncoNPC predictions.** Top 15 most important features, based on mean absolute SHAP values (i.e.,  $\hat{\mu}(|SHAP|)$  [6]), for cancer types that had a minimum of 20 CUP tumors classified.

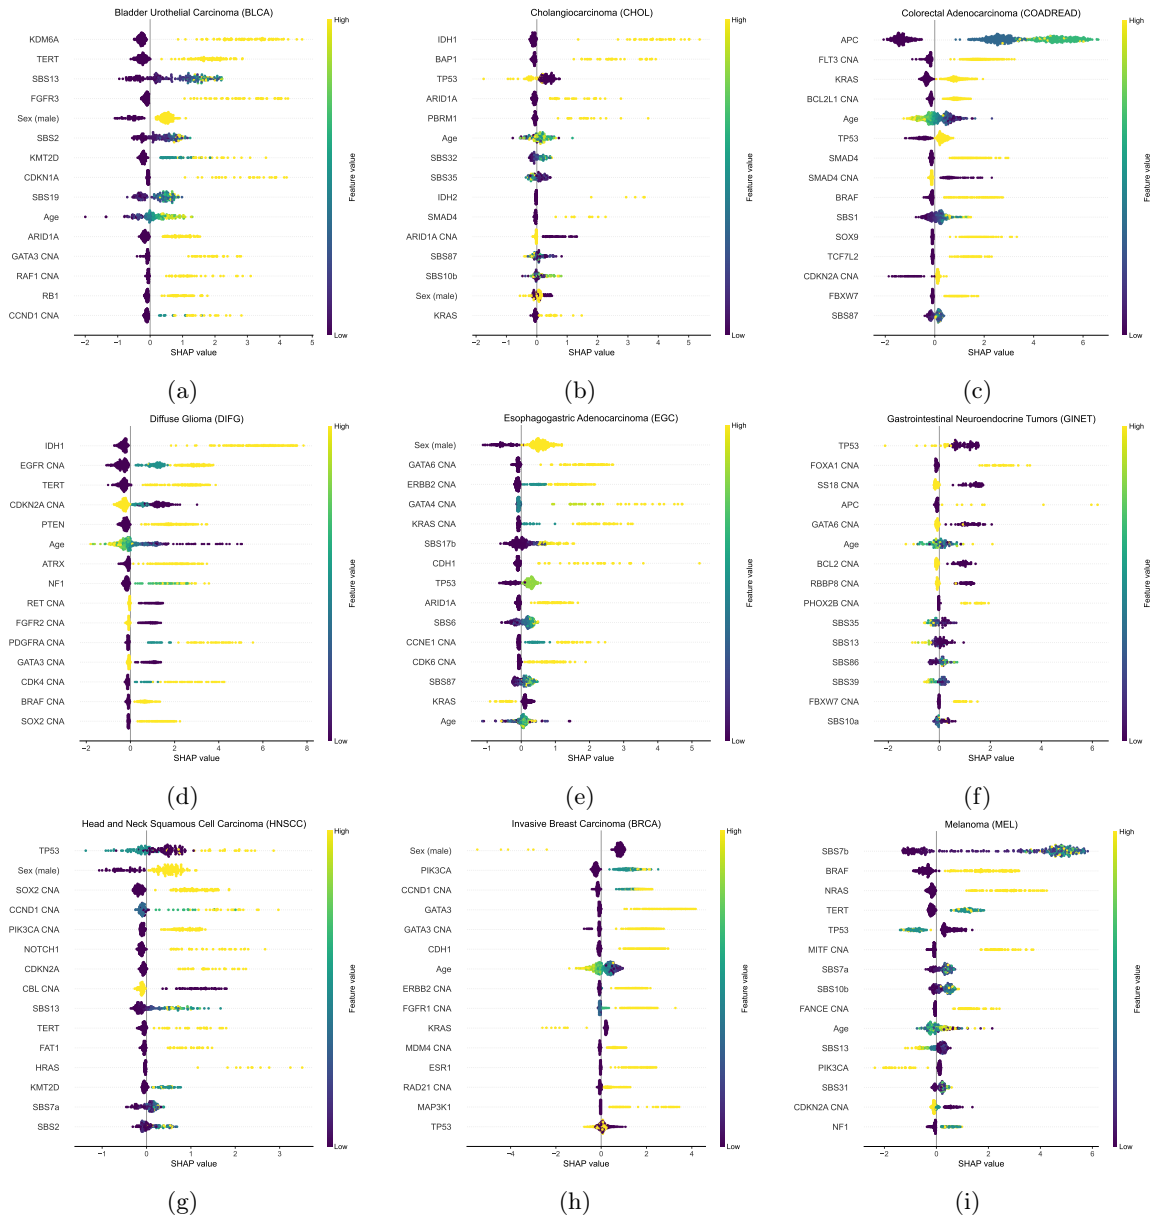

Figure S6

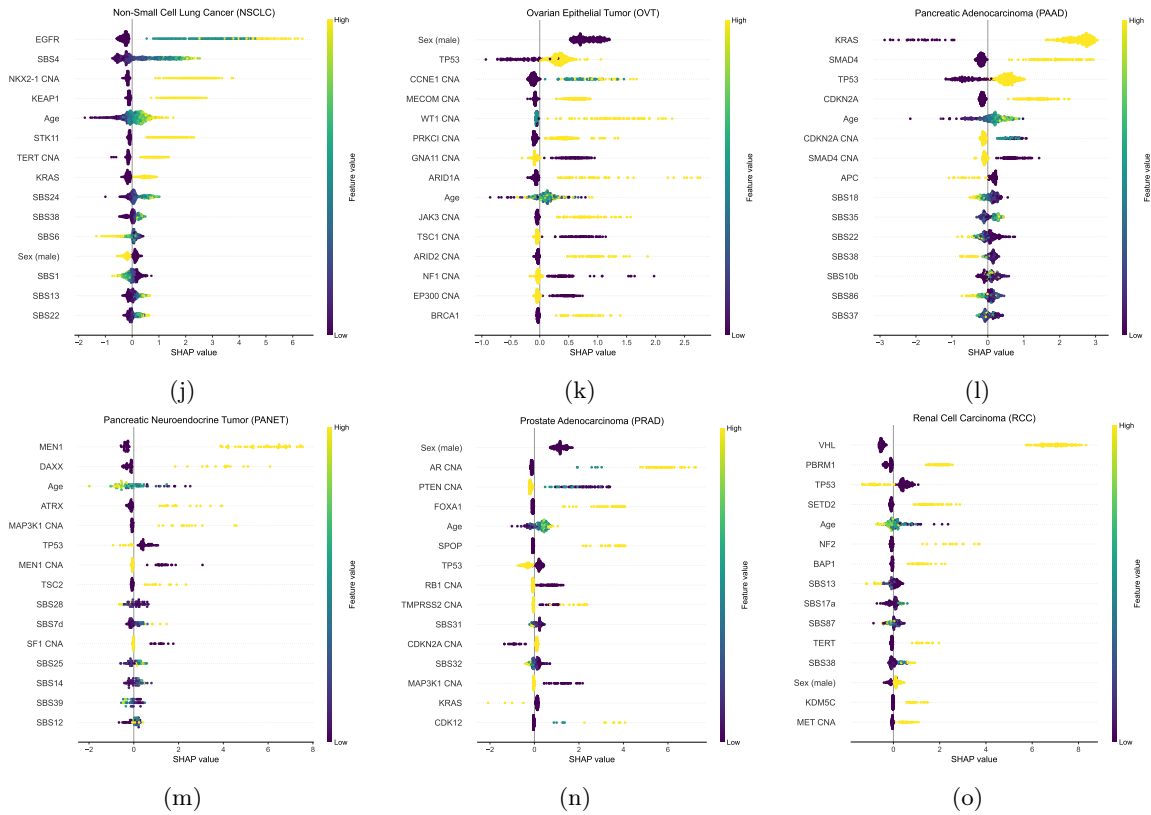

Figure S6: **SHAP summary plot** [6] for cancer types that had a minimum of 20 CUP tumor samples classified. SAHP values (i.e., impact on OncoNPC predictions) are shown on the x-axis, while feature values are shown as a color map (from purple to yellow). In each plot, CUP and CKP tumor samples were combined into a single cohort for the corresponding cancer.

835 **4. Robustness of OncoNPC performance with respect to key genomics**  
836 **input features**

837 In order to identify the key panel features, we took the average of absolute SHAP values for each  
838 input feature across 22 cancer types. We then utilized these aggregated feature importance values  
839 to rank the input features, which were primarily related to age, sex, mutation, and CNA events.  
840 The top 20 most crucial features with their aggregated SHAP values are shown in Supplementary  
841 Table S1, while Supplementary Data 3 provides a full list of the ranked input features along with  
842 their corresponding aggregated SHAP values.

Table S1: Top 20 most globally important features with their aggregated SHAP values. To obtain the aggregated SHAP values, we took the average of absolute SHAP values for each input feature across 22 cancer types. We utilized these aggregated SHAP values to rank the input features, which were primarily related to age, sex, mutation, and CNA events. See Supplementary Data 3 for a full list of the ranked input features along with their corresponding aggregated SHAP values

| OncoNPC features | Aggregated SHAP |
|------------------|-----------------|
| Sex              | 0.659           |
| TP53             | 0.523           |
| Age              | 0.376           |
| KRAS             | 0.326           |
| CDKN2A CNA       | 0.180           |
| PIK3CA           | 0.158           |
| APC              | 0.120           |
| BRAF             | 0.117           |
| MYC CNA          | 0.103           |
| EGFR CNA         | 0.095           |
| TERT             | 0.088           |
| PTEN             | 0.078           |
| KIT              | 0.069           |
| ARID1A           | 0.067           |
| KMT2D            | 0.065           |
| CCND1 CNA        | 0.063           |
| CDKN2B CNA       | 0.053           |
| NF2              | 0.053           |
| SMAD4 CNA        | 0.053           |
| ERBB2 CNA        | 0.050           |

843 Furthermore, in order to investigate the impact of input genomics features on OncoNPC’s ro-  
844 bustness, we performed a feature ablation study, where we chose the most important genes based on  
845 their aggregated SHAP values from the previous analysis and gradually reduced them from all 846  
846 features associated with those genes, as well as age and sex, to only the top 10% (i.e., top 29 fea-

847 tures). In each feature configuration, we re-trained the model with the same set of hyperparameters  
848 and evaluated its performance on the held-out CKP (Cancer with Known Primary) tumor samples  
849 ( $n = 7,289$ ), which were utilized throughout this work. The results of this analysis are presented  
850 in Extended Data Fig. 3, which shows the breakdown of OncoNPC performance in F1 score by 22  
851 cancer types across increasing prediction confidence. The cancer types on the y-axis are sorted in a  
852 decreasing order of the number of tumor samples. Finally, Supplementary Data 4 provides a list of  
853 input features that correspond to the selected genes in each configuration.

854 OncoNPC demonstrates good overall performance, even when using just the top 50% of features  
855 compared to using all the chosen features, with an overall weighted F1 score of 0.757 vs. 0.777 at a  
856 minimum  $p_{\max}$  threshold of 0, and an F1 score of 0.950 vs. 0.960 at the minimum  $p_{\max}$  threshold  
857 of 0.9. However, when using only the top 10% of features, the performance drops significantly  
858 across all cancer types compared to using all the chosen features, with an overall weighted F1  
859 score of 0.512 at a minimum  $p_{\max}$  threshold of 0.0 and 0.892 at a minimum  $p_{\max}$  threshold of 0.9.  
860 Interestingly, minority cancer types, such as MEL (Melanoma), RCC (Renal Cell Carcinoma), GIST  
861 (Gastrointestinal Stromal Tumor), and GINET (Gastrointestinal Neuroendocrine Tumors), showed  
862 improved performance when we selected only the top 50% of features compared to the full feature  
863 setting. Specifically, MEL had an F1 score of 0.771 vs. 0.761, RCC had an F1 score of 0.769 vs.  
864 0.759, GIST had an F1 score of 0.833 vs. 0.824, and GINET had an F1 score of 0.488 vs. 0.475 at a  
865 minimum  $p_{\max}$  threshold of 0. We suspect that dropping features regularizes the feature space and  
866 improves generalizability over some of the minority cancer types.

867 In summary, our feature ablation study demonstrates OncoNPC achieves good performance even  
868 with a reduced set of genes. While prospective users should still exercise caution and conduct a  
869 thorough evaluation on their own patient population before integrating the model into their clinical  
870 workflow, our results suggest that the OncoNPC model may be applicable to a broader range of  
871 cancer centers, especially those with resource constraints that limit the number of genes that can be  
872 targeted in their sequencing panels.

## 873 **5. Difference in OncoNPC prediction confidence across CUP and CKP** 874 **cohorts**

875 We investigated how OncoNPC prediction confidence varied across different cohorts, including CUP  
876 tumors at DFCI and MSK, as well as rare CKP tumors at DFCI. Specifically, we referred to the  
877 cohort of the rare CKP tumors whose cancer types were not considered during the development of  
878 OncoNPC as "DFCI excluded CKP tumors". We note that all cohorts in this analysis were not  
879 seen by OncoNPC during the model training. The results are presented in Extended Data Fig. 2b.  
880 As expected, the held-out test CKP tumors from cancer types that were considered in OncoNPC  
881 had the highest prediction confidence (mean 0.881, 95% C.I. 0.875 - 0.887), whereas held-out CKP  
882 tumors from cancer types that were not considered in OncoNPC (i.e., DFCI excluded CKP tumors)  
883 had the lowest prediction confidence (mean 0.674, 95% C.I. 0.667 - 0.681), suggesting that OncoNPC  
884 is able to properly down-weight the confidence for target cancer types that were not included in the  
885 OncoNPC model training. Interestingly, the overall prediction confidence of DFCI CUP tumors

886 (mean 0.764, 95% C.I. 0.75 - 0.778) and MSK CUP tumors (mean 0.761, 95% C.I. 0.743 - 0.779)  
887 were comparable to that of all DFCI CKP tumors including the rare tumors (mean 0.769, 95% C.I.  
888 0.764 - 0.774). Though further study is merited, the similarity in prediction confidence between all  
889 CUP and CKP tumors suggests that CUP tumors may harbor rare primary cancers, resulting in a  
890 comparable mixture of known cancer types as seen in CKP tumors. Finally, we observed that among  
891 the held-out CKP tumor samples, prediction confidence was highest for tumors at DFCI, followed  
892 by tumors at MSK and VICC (DFCI: mean 0.88, 95% C.I. 0.875 - 0.887, MSK: mean 0.856, 95%  
893 C.I. 0.85 - 0.863, and VICC: mean 0.804, 95% C.I. 0.778 - 0.830; see Extended Data Fig. 2c).

## 894 **6. Accuracy of germline imputation for panel-sequenced tumors**

895 To impute common SNPs in the tumor data, ultra low coverage off-target reads and the 1000  
896 Genomes Phase 3 reference panel with the STITCH algorithm were used [7]. This method has been  
897 extensively evaluated in previous research and was implemented using the default parameters that  
898 were previously published [8]. In the germline data, patients were genotyped on the Illumina Multi-  
899 Ethnic Global (MEG) SNP array and imputed to the 1000 Genomes Phase 3 reference panel using  
900 the Michigan Imputation Server. To ensure high-quality results, each cohort underwent variant-  
901 level quality control and was then limited to SNPs in HapMap3, which are typically well-imputed  
902 in GWAS and capture the majority of genetic variation [9].

903 To estimate the polygenic risk scores (PRS), common germline variants were first imputed directly  
904 from tumor-sequencing using the previously described approach that combines off-target reads and  
905 a haplotype reference panel [8]. Although this method has a mean SNP imputation accuracy of  
906 0.86 across the genome, it may have biases towards on-target genes (where proximal coverage is  
907 high) and against deleted regions (where coverage is low). To evaluate the accuracy of the tumor  
908 off-target PRS, a subset of 1509 tumor samples from the Mass General Brigham (MGB) Biobank,  
909 including 57 CUP tumors, were used to obtain direct germline SNP array genotyping. The mean  
910 tumor-germline correlation was 0.92 (s.e. 0.006) for all tumors and 0.91 (s.e. 0.01) for CUP tumors  
911 across the cancer types for which PRS were calculated. No significant differences were observed for  
912 any individual cancer PRS (see Supplementary Fig. S7).

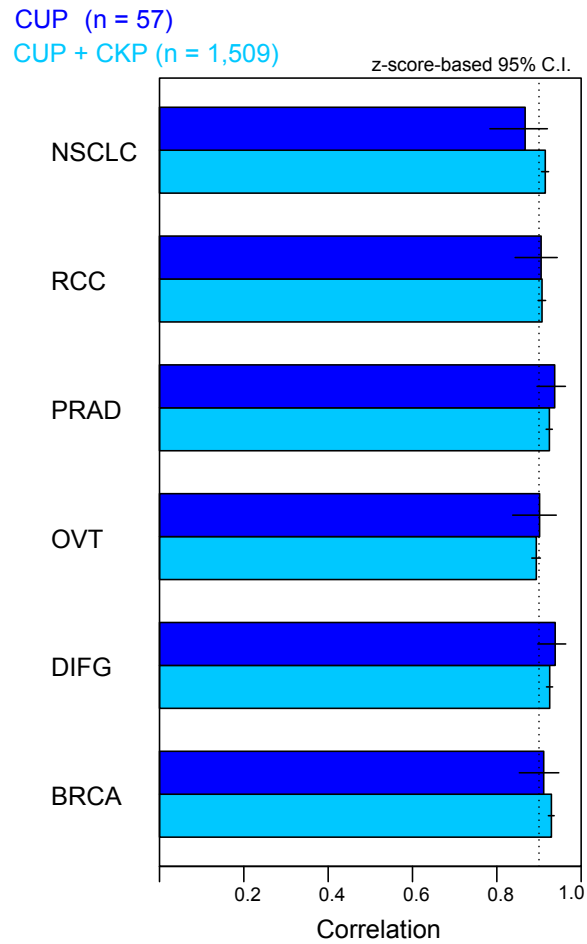

Figure S7: **Correlation between the germline PRS and imputed PRS across cancer types for which the PRS were calculated.** The light blue bars represent all CUP and CKP samples (n = 1,509), while the blue bars represent CUP samples (n = 57) with matched germline genotyping. The vertical dotted line at 0.9 serves as a reference point for correlation.



## 913 7. CUP-CKP metastatic survival comparison

914 We estimated median survival times of patients across CUP-metastatic CKP pairs using the Kaplan-  
915 Meier estimator [10] to account for patients lost to follow-up. For the CUP cohort, we excluded  
916 patients with CUP that were lost to follow up at the time of tumor sequencing and those whose  
917 primary cancer types were predicted with low probability (see the exclusion criteria in Extended  
918 Data Fig. 6). The resulting CUP cohort ( $n = 685$ ), was then restricted to OncoNPC cancer types  
919 with more than 35 CUP patients. For the CKP metastatic cohort, we excluded patients lost to  
920 follow up at the tumor sequencing time in the same manner and chose patients with one of the  
921 known cancers, where either the biopsy was metastatic or the patient had an ICD-10 code indicative  
922 of secondary malignant neoplasms within a year prior to sequencing dates. A total of 521 and 5,937  
923 patients were thus retained from the CUP cohort and metastatic CKP cohort, respectively: NSCLC  
924 ( $n_{\text{CUP}} = 200$ ,  $n_{\text{met-CKP}} = 1,559$ ), PAAD ( $n_{\text{CUP}} = 80$ ,  $n_{\text{met-CKP}} = 357$ ), BRCA ( $n_{\text{CUP}} = 67$ ,  $n_{\text{met-CKP}}$   
925  $= 1,656$ ), COADREAD ( $n_{\text{CUP}} = 54$ ,  $n_{\text{met-CKP}} = 1,198$ ), HNSCC ( $n_{\text{CUP}} = 44$ ,  $n_{\text{met-CKP}} = 216$ ),  
926 EGC ( $n_{\text{CUP}} = 40$ ,  $n_{\text{met-CKP}} = 336$ ), and OVT ( $n_{\text{CUP}} = 36$ ,  $n_{\text{met-CKP}} = 615$ ). Note that patients  
927 with CUP, whose predicted cancer type is GINET ( $n_{\text{CUP}} = 39$ ,  $n_{\text{CKP}} = 118$ ), were excluded due to  
928 the fact that the estimated survival function for the CUP cohort never reached 50 percent.

929 We then investigated if cancer-specific prognosis is shared between CUP predicted cancers and  
930 their corresponding CKP metastatic cancers. Utilizing overall survival data linked to the National  
931 Death Index and in-house follow-up data (see Methods), we found that median survival times of  
932 CUP-metastatic CKP pairs were significantly correlated across the cancer types (Spearman’s  $\rho$ :  
933 0.964, p-value:  $4.54 \times 10^{-4}$ ; Main Fig. 4b). This significant relationship provides evidence that  
934 genetics-based OncoNPC predictions capture prognostic signals specific to each predicted cancer  
935 type. While correlated, median survival times were significantly lower for patients with CUP com-  
936 pared to those with metastatic CKP: CUP median survival 14.0 months (95% C.I. 11.9 - 15.8,  $n$   
937  $= 685$ ) vs. metastatic CKP median survival 23.1 months (95% C.I. 21.8 - 24.2,  $n = 7,797$ ). This  
938 is expected as CUPs are an advanced metastatic cancer with limited treatment options [11]. The  
939 absolute difference in median survival was significant across all predicted CUP - metastatic CKP  
940 pairs with the exception of Pancreatic Adenocarcinoma (CUP PAAD median survival 8.61 months  
941 95% C.I. 5.09 - 10.8 vs. metastatic CKP PAAD median survival 6.73 months 95% C.I. 5.98 - 8.02),  
942 known to be a particularly deadly cancer type.

## 943 8. Prognostic somatic variants shared in CUP-metastatic CKP pairs

944 To identify prognostic somatic variants shared between CUP-metastatic CKP pairs, we restricted  
945 to the 7 common OncoNPC subgroups with at least 35 CUP tumors: NSCLC, PAAD, BRCA,  
946 COADREAD, HNSCC, EGC, GINET, and OVT. We utilized the processed input somatic features  
947 encoded in the OncoNPC model (see Methods). To ensure sufficient statistical power, we considered  
948 somatic features (i.e., mutated genes and CNA genes) present in at least 15 tumors in both the  
949 CUP and metastatic CKP cohorts, with each pair having the matching cancer type. Finally, we also  
950 considered all 96 mutational signature features.

951 After selecting the cancer types to consider in the CUP-metastatic CKP pairs and candidate

952 somatic variants for each pair, we iteratively tested each feature for association with survival in both  
953 CUP and corresponding metastatic CKP cohorts, where each pair had the matching cancer type.  
954 A multivariable Cox Proportional Hazard regression [12] model was used with time-to-death from  
955 sequencing as the outcome. To adjust for baseline effects, we included age at the time of sequencing,  
956 sex, tumor sequencing panel version, mutational burden (i.e., sum of total somatic mutations in  
957 each tumor sample), and CNA burden (i.e., sum of total CNA events in each tumor sample) as  
958 covariates. Finally, to identify shared prognostic somatic variants for each CUP-metastatic CKP  
959 pair, we retained somatic variants which passed Schoenfeld residuals-based proportional hazard tests  
960 with p-value threshold of 0.05 (Python `lifelines` [13]) and were nominally significant (association  
961 p-value < 0.05) for both CUP and CKP cancer types in each pair.

962 Three out of 14 tested CUP-metastatic CKP pairs, specifically NSCLC, PAAD, and COAD-  
963 READ, showed shared prognostic somatic variants significantly associated with overall survival with  
964 nominal p-value cut-off at 0.05 (Supplementary Fig. S8a and S8b). In patients with known or classi-  
965 fied NSCLC, three somatic mutations were associated with poor survival in both groups: *SMARCA4*  
966 (CUP: H.R. 1.86, 95% C.I. 1.19 - 2.89, p-value  $6.23 \times 10^{-3}$ , CKP mets: H.R. 1.73, 95% C.I. 1.44 - 2.09,  
967 p-value  $9.30 \times 10^{-9}$ ), *STK11* (CUP: H.R. 1.76, 95% C.I. 1.14 - 2.71, p-value  $1.05 \times 10^{-2}$ , CKP mets:  
968 H.R. 1.43, 95% C.I. 1.22 - 1.68, p-value  $1.00 \times 10^{-5}$ ), and *KEAP1* (CUP: H.R. 1.83, 95% C.I. 1.18  
969 - 2.85, p-value  $6.82 \times 10^{-3}$ , CKP mets: H.R. 1.40, 95% C.I. 1.18 - 1.66, p-value  $1.27 \times 10^{-4}$ ). These  
970 associations of somatic mutations in *SMARCA4*, *STK11*, and *KEAP1* genes with overall survival  
971 are well established for NSCLC [14–16]. Interestingly, a CNA event in *NKX2-1* was associated with  
972 improved survival in the patients from the NSCLC pair (CUP: H.R. 0.542, 95% C.I. 0.326 - 0.901,  
973 p-value  $1.83 \times 10^{-2}$ , CKP mets: H.R. 0.770, 95% C.I. 0.662 - 0.894, p-value  $6.28 \times 10^{-4}$ ), consistent  
974 with prior meta-analyses [17]. In patients with known or classified COADREAD tumors, SBS10b  
975 mutation signature, linked to polymerase epsilon exonuclease domain mutations [18], was associated  
976 with longer overall survival (CUP: H.R. 0.371, 95% C.I. 0.148 - 0.928, p-value  $3.41 \times 10^{-2}$ , CKP  
977 mets: H.R. 0.495, 95% C.I. 0.255 - 0.958, p-value  $3.68 \times 10^{-2}$ ). Finally, in patients with known or  
978 classified PAAD tumors, the SBS29 mutation signature (commonly found in tumor samples from  
979 individuals with a tobacco chewing habit [18]) was associated with poor survival in CUPs but nomi-  
980 nally protective in metastatic CKPs (CUP: H.R. 2.66, 95% C.I. 1.02 - 6.93, p-value  $4.46 \times 10^{-2}$ , CKP  
981 mets: H.R. 0.657, 95% C.I. 0.438 - 0.986, p-value  $4.28 \times 10^{-2}$ ). Although these somatic associations  
982 remain to be validated in independent cohorts, by categorizing patients with CUP based on their  
983 OncoNPC predictions, we were able to identify prognostic somatic variants, consistent with recent  
984 research findings.

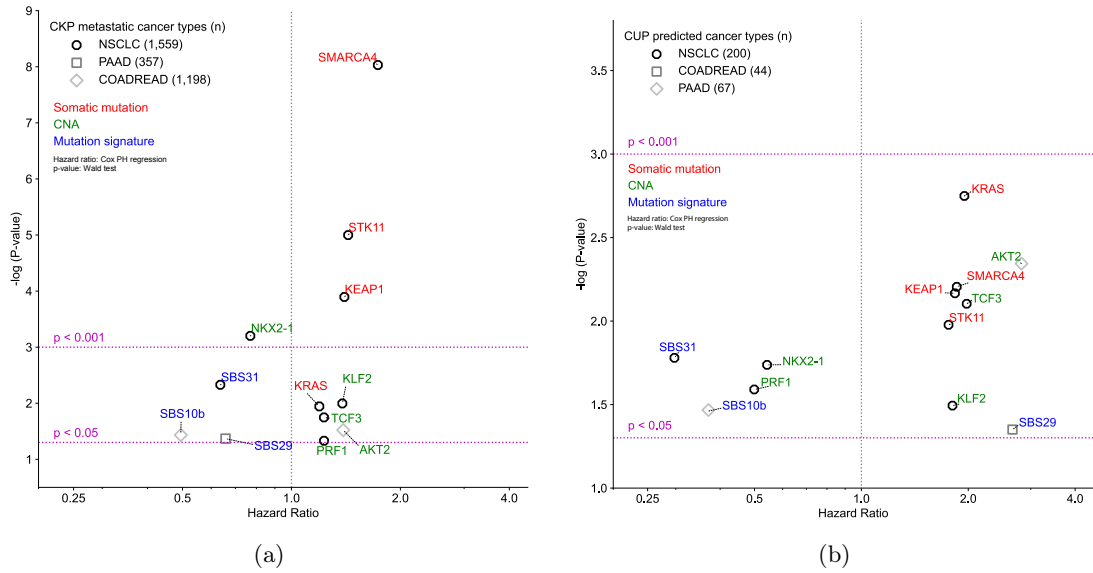

Figure S8: **Prognostic somatic biomarkers shared between CUP and metastatic CKP tumors across OncoNPC predicted cancers.** (a), (b) Prognostic somatic variants significantly associated with overall survival, shared between three different CUP (a)-metastatic CKP (b) pairs (NSCLC: ○, PAAD: □, and COADREAD: ◇). Variant types are indicated by colors: red for somatic mutations, green for CNAs, and blue for mutation signatures. To estimate hazard ratio for each somatic biomarker, a multivariable Cox Proportional Hazard regression [12] model was used with time-to-death from sequencing as the outcome, while adjusting for baseline effects including age, sex, tumor sequencing panel version, mutational burden, and CNA burden.

## 985 **9. Determining treatment-OncoNPC concordance**

986 Concordance of OncoNPC predicted cancer type with the first palliative treatment assignment at  
987 DFCI was classified in one of four categories: 1) “TRUE”: the OncoNPC cancer type matched the  
988 clinically proven/suspected tumor type and the treatment received, which was dictated by NCCN  
989 guidelines and/or standard of care, within the clinical context provided by the medical record; 2)  
990 “FALSE”: the OncoNPC cancer type did not match the clinically proven/suspected cancer type and  
991 the treatment was not appropriate per NCCN guidelines or standard of care, in most reasonable  
992 situations, and within the context of the medical record; 3) “SOFT FALSE”: the OncoNPC cancer  
993 type did not match the clinically proven/suspected cancer type, but the treatment received was not  
994 chosen based on NCCN guidelines or standard of care, owing to the unique clinical context provided  
995 by the medical record, 4) “EMPIRIC”: treatment received was empiric treatment for cancer of  
996 unknown primary (e.g., carboplatin/taxol or gemcitabine/cisplatin) with the corresponding clinical  
997 rationale. In cases where patients received these regimens but not with the clinical intent of empiric  
998 CUP treatment (i.e., as regimens intended for treating other tumor types), the treatment was not  
999 labeled as “EMPIRIC” and the case was instead evaluated in context of the proven/suspected tumor  
1000 type. In our analysis, we considered the TRUE group as the concordant group, and FALSE and  
1001 SOFT FALSE groups as the discordant group. We did not include the EMPIRIC group, which is  
1002 typically a more challenging patient population with systematically worse outcomes [19].

## 1003 **10. Additional discoveries in the treatment concordance analysis**

1004 Upon reassessing the charts of 158 patients in the cohort, there were some tumors in both groups  
1005 where patients had a prior history of a known primary cancer, and the tumor being evaluated as  
1006 a CUP was clinically felt to be a recurrence of that primary cancer: 13 patients (16.9%) in the  
1007 concordant group and 12 patients (14.8%) in the discordant group. Notably, even after removing  
1008 these samples from both groups, the analysis still showed a favorable outcome in the concordant  
1009 group (see Supplementary Fig. S9; multivariable Cox regression: H.R. 0.400, 95% C.I. 0.232 – 0.700,  
1010 p-value  $1.31 \times 10^{-3}$  and IPTW Kaplan-Meier estimator: weighted log-rank test p-value  $2.87 \times 10^{-5}$ ).  
1011 This indicates that OncoNPC predictions continue to provide clinical benefits for the remaining  
1012 CUP cases without a prior history of a known primary cancer.

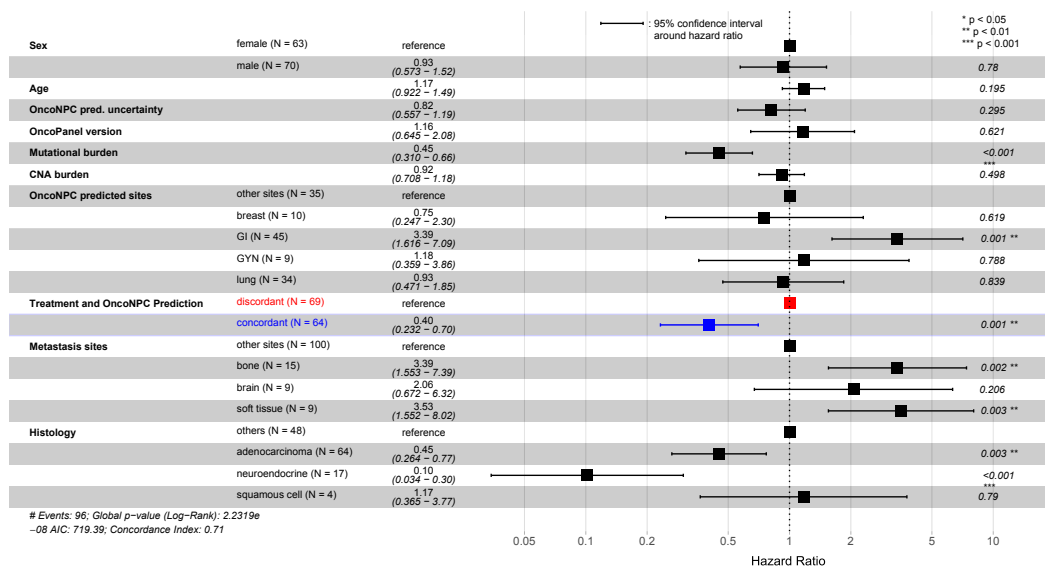

(a)

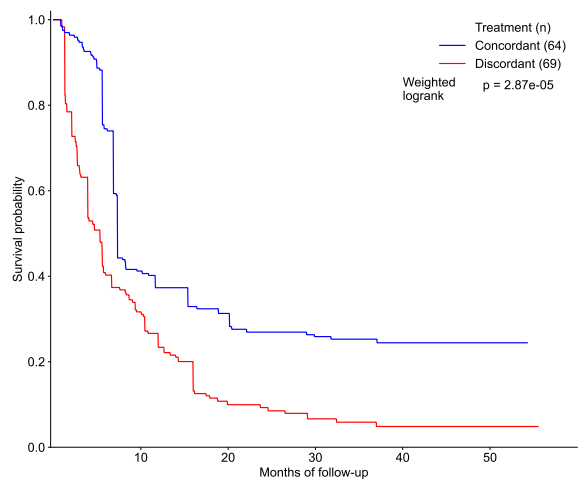

(b)

Figure S9: **Estimating impact of the treatment-OncoNPC concordance on survival for patients with CUP who do not have a prior history of known primary cancers.** Among the original CUP treatment concordance analysis cohort (n = 158), we removed 13 patients (16.9%) in the concordant group and 12 patients (14.8%) in the discordant group who had history of a known primary cancer. Notably, after removing these samples from both groups, our results showed a favorable outcome in the concordant group: (a) Multivariable Cox regression: H.R. 0.400, 95% C.I. 0.232 – 0.700, p-value  $1.31 \times 10^{-3}$ , and (b) IPTW Kaplan-Meier estimator: weighted log-rank test p-value  $2.87 \times 10^{-5}$ .

1013 The multivariable Cox regression (Main Fig. 5a) additionally identified significant hazardous  
 1014 effects of age, gastrointestinal (GI) cancer types predicted by OncoNPC, and bone metastasis (H.R.  
 1015 1.27, 95% C.I. 1.02 – 1.58, p-value  $3.10 \times 10^{-2}$ , H.R. 4.20, 95% C.I. 2.06 – 8.55, p-value  $7.78 \times 10^{-5}$ , and  
 1016 H.R. 3.73, 95% C.I. 1.84 – 7.59, p-value  $2.71 \times 10^{-4}$ , respectively), and significantly protective effects

1017 of tumor mutational burden (TMB), as well as adenocarcinoma and neuroendocrine tumor group  
 1018 determined by the histopathology results (H.R. 0.537, 95% C.I. 0.388 - 0.742, p-value  $1.64 \times 10^{-4}$ , H.R.  
 1019 0.439, 95% C.I. 0.272 - 0.710, p-value  $7.85 \times 10^{-4}$  and H.R. 0.0854, 95% C.I. 0.0298 - 0.245, p-value  
 1020  $4.79 \times 10^{-6}$ , respectively). In the IPTW Kaplan-Meier analysis, we found that treatment concordance  
 1021 with the OncoNPC prediction was associated with Gastrointestinal (GI) cancer types (coefficient  
 1022 1.916, 95% C.I. 0.627 - 3.205, p-value  $3.57 \times 10^{-3}$ ), whereas male sex and OncoNPC prediction  
 1023 uncertainty (i.e., entropy of predictive probability distribution over the considered cancer types)  
 1024 were inversely associated with receiving concordant treatment (coefficient -1.259, 95% C.I. -2.283 -  
 1025 -0.234, p-value  $1.61 \times 10^{-2}$ , and coefficient -1.693, 95% C.I. -2.458 - -0.927, p-value  $1.46 \times 10^{-5}$ ; see  
 1026 Supplementary Fig. S10). These associations with treatment concordance are consistent with likely  
 1027 GI CUPs being more clinically identifiable and low OncoNPC confidence CUPs being less clinically  
 1028 and pathologically identifiable (see Supplementary Note 11.4 for a pathology-based evaluation of  
 1029 OncoNPC predictions for CUP tumors). We note, however, that the IPTW approach specifically  
 1030 adjusts for these systematic differences when estimating the effect of the treatment concordance on  
 1031 survival.

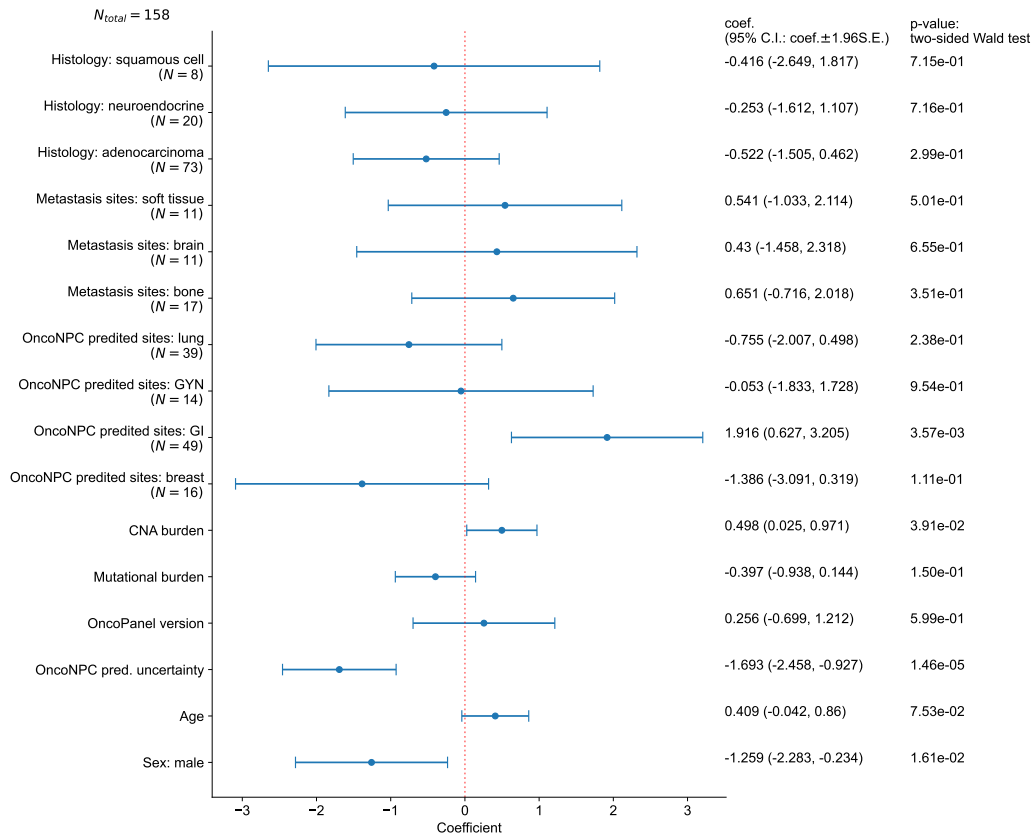

Figure S10: **Summary of coefficients for estimating treatment-OncoNPC concordance.** Formally, we estimated out-of-sample  $P(A|X)$ , where  $A$  corresponds to the treatment-OncoNPC concordance, using a logistic regression model in a 10-fold cross-fitting. The coefficients were obtained from the first fold. See Methods.

## 11. OncoNPC-guided actionable variants in patients with CUP

We investigated if OncoNPC classifications could inform genomically-guided, site-specific treatment options that are typically available for cancers with known primaries. We utilized OncoKB [20] as a knowledge base and considered three different categories of potentially actionable somatic variants: oncogenic mutation, amplification, and fusion (see Methods). OncoNPC cancer type predictions enabled identification of potentially actionable somatic variants across CUP tumor samples (total 22.8% of the eligible CUP tumor samples; see Extended Data Fig. 9). The majority of potentially actionable somatic variants for patients with CUP were oncogenic mutations (183 counts; 87.1%), followed by amplifications (22 counts; 9.52%) and fusions (7 counts; 3.33%) as shown in Extended Data Fig. 9a. The four most frequent oncogenic mutations were in *PIK3CA*, *KRAS*, *ALK*, and *ERBB2* genes, occurring in CUP tumor samples classified as BRCA (*PIK3CA* and *ERBB2* genes) and NSCLC (*KRAS*, *ALK*, and *ERBB2* genes). Overall, among the eligible CUPs whose prediction confidences are greater than 0.5 ( $N = 794$ ; see Extended Data Fig. 6 for the exclusion criteria), OncoNPC predictions identified potentially actionable somatic variants for 11.5% of the CUP tumor samples for Level 1 therapeutic level (FDA-approved drugs), 3.63% for Level 2 (Standard care), 6.64% for Level 3 (Clinical evidence), and 1.00% for Level 4 (Biological evidence), summing up to the total 22.8% of the eligible CUP tumor samples (Extended Data Fig. 9b).

## 12. Performance of OncoNPC vs. gene expression and whole genome sequencing-based classifiers

### OncoNPC vs. gene expression profiling (GEP)-based classifier

Gene expression profiling is a method that enables a comprehensive and holistic understanding of cellular behavior, providing insight into unique expression patterns specific to various cancer types. In contrast, targeted panel sequencing focuses on the detection of known cancer-associated genes and mutations within them. This approach typically involves a limited number of genes, ranging from tens to hundreds. For example, OncoPanel, a targeted panel sequencing platform at the DFCI, covers 447 key cancer genes.

We assessed the confidence of classifiers using targeted panel sequencing data versus gene expression profiling by comparing the proportions of confident samples in our cohort of unresolved CUP tumor samples ( $n = 158$ ; see the exclusion criteria in Extended Data Fig. 6) to those of confident samples in a previous study that used a gene expression profiling-based classifier for clinicopathology-unresolved CUPs ( $n = 146$ ) [21]. The gene expression profiling data in the previous study were obtained from a NanoString panel that targeted 225 genes differentially expressed across 18 tumor classes and viral transcripts encoding capsid proteins for HPV16 L1, HPV18 L1, and Merkel cell polyomavirus (VP2). The previous study found that high-medium confidence ( $>0.8$ ) classifications were made for 56.2% (82/146) of cases, while in our cohort of 158 CUP cases, 96 patients had a prediction confidence for primary sites greater than 0.8 (60.8%; 95/158), which is comparable to the findings based on gene expression profiling. It is not possible to compare clinical and biological characteristics of patients with high confidence predictions across two classifiers. However, as dis-

1070 cussed in [21], a DNA sequencing panel may be more diagnostically valuable than gene expression  
1071 profiling for CUP tumors, as they often have an atypical transcriptional profile but retain diagnostic  
1072 mutation features.

### 1073 **OncoNPC vs. whole genome sequencing (WGS)-based classifier**

1074 Whole genome sequencing (WGS) allows for the analysis of the entire genome, including all somatic  
1075 and germline mutations, providing a comprehensive understanding of the mutational landscape of  
1076 cancer cells. Unlike targeted panel sequencing, which captures mutations in a specific set of genes,  
1077 WGS detects mutations in any region of the genome, providing information on regional mutational  
1078 density features that cannot be accessed otherwise. A WGS-based classifier developed by [22] found  
1079 that the distribution of somatic passenger mutations across the genome is the most predictive feature  
1080 for cancer type prediction, reflecting chromatin accessibility to DNA repair complexes and relating  
1081 to the epigenetic state of the cancer cell of origin.

1082 This is further supported by the performance comparison of classifiers. Although the OncoNPC  
1083 classifier based on targeted panel sequencing achieved an accuracy of 79.0% for held-out primary  
1084 tumors ( $n = 4,525$ ) and 79.8% for metastatic tumors ( $n = 2,605$ ) across 22 different cancer types, the  
1085 WGS-based classifier [22] outperformed OncoNPC for a larger number of cancer types. Specifically,  
1086 the WGS-based classifier achieved an accuracy of 88% for held-out primary tumors ( $n = 1,436$ )  
1087 across 24 cancer types and 83% for metastatic tumors ( $n = 2,028$ ) across 16 cancer types.

1088 Finally, we would like to note that comparing our targeted panel sequencing-based classifier,  
1089 OncoNPC, to classifiers based on other sequencing technologies in an apple-to-apple manner is  
1090 challenging due to differences in patient populations, modeled cancer types, and other technical  
1091 factors such as the architecture of the machine learning models used. Nevertheless, we believe a key  
1092 advantage of an NGS targeted panel sequencing-based algorithm is the widespread use of this assay  
1093 in routine clinical practice as well as widely available commercial platforms. In particular, we see a  
1094 major opportunity for the use of OncoNPC for CUP tumors in community clinics where access to  
1095 detailed diagnostic evaluations and expert pathology reviews is limited.

## 1096 **13. Insights from chart reviews of 158 patients with CUP**

### 1097 **Discordance between treatments and OncoNPC predictions in patients with CUP**

1098 In order to identify potential reasons behind the discordance, we have looked at pathological findings  
1099 as well as other factors such as ECOG performance status and issues pertaining to insurance or access  
1100 to medical care. A trained oncologist reviewed the medical chart records of all 158 patients in the  
1101 cohort at DFCI, and we found that there was no significant difference in ECOG performance status  
1102 between the treatment-OncoNPC prediction concordant and discordant groups. The median ECOG  
1103 was 1 for both groups, and the mean ECOG was 0.816 and 0.778 for the concordant and discordant  
1104 groups, respectively. Only one patient in the discordant group received emergency and empiric  
1105 treatment due to superior vena cava syndrome, but otherwise, all patients in the discordant group  
1106 were treated without any extenuating circumstances, insurance issues, or access barriers.



## 1107 **Diagnostic utility of OncoPanel identified mutation signatures**

1108 After reviewing the genomic specimen reports for the patients with CUP in the cohort, we have  
1109 identified Tobacco, APOBEC, and UVA mutations signatures in 4 and 14 patients belonging to the  
1110 concordant (Tobacco = 2, APOBEC = 0, UVA = 2) and discordant (Tobacco = 4, APOBEC =  
1111 4, UVA = 6) groups, respectively. We have provided details on the OncoPanel identified mutation  
1112 signatures and actionable variants for each patient in Supplementary Data 5. Based on the patient  
1113 chart reviews, we found that out of the 18 cases with detectable mutation signatures (UVA, tobacco,  
1114 and APOBEC), only 5 cases (27.7%) were diagnostically useful. Notably, only the UVA and tobacco  
1115 signatures were helpful in identifying cutaneous and thoracic malignancies, respectively, while the  
1116 APOBEC signature was not useful in diagnosis. In two cases (11.1%), the presence of a UVA  
1117 signature directly led to the diagnosis of melanoma and subsequent use of immunotherapy. In  
1118 another case, a patient who had never smoked and presented with a pulmonary mass and visceral  
1119 metastases was initially thought to have lung cancer; however, OncoPanel testing showed a strong  
1120 UV damage signal, favoring a diagnosis of melanoma over non-small cell lung cancer. The patient  
1121 was subsequently treated with pembrolizumab, which led to significant improvement in all disease  
1122 sites after three cycles. In this patient’s tumor sample, we would like to highlight that OncoNPC  
1123 accurately predicted melanoma.

## 1124 **Retrospective pathology-based evaluation of OncoNPC predictions**

1125 To assess the concordance of OncoNPC prediction with pathology-based suspected primaries, we  
1126 retrospectively reviewed available pathological data containing histology and immunohistochemistry  
1127 information. A certified oncologist at the DFCI reviewed the pathology notes, containing histologic  
1128 and morphologic features, immunohistochemical stains, and integration of these features by a subspe-  
1129 cialized (disease-specific) pathologist, for the 158 patients with CUP in the treatment-concordance  
1130 analysis (see Extended Data Fig. 6 for the exclusion criteria). It is worth noting that these pa-  
1131 tients had received comprehensive diagnostic work-up and were treated at DFCI. We were able to  
1132 identify top 3 pathology-based suspected primaries for 129 of these patients, and among them, the  
1133 top 5 most frequently suspected primaries were Gastrointestinal (26.8%), Pancreatic (18.3%), Lung  
1134 (11.3%), Cholangiocarcinoma (11.3%), and Gynecologic (mullerian, ovary, and endometrial; 6.57%).

1135 Subsequently, we examined the level of agreement between the OncoNPC primary site prediction  
1136 and the top 3 suspected primary sites based on pathology. For this analysis, we considered the  
1137 prediction to be concordant if it matched any of the top 3 suspected primary sites, and discordant if  
1138 it did not. Overall, we found that there was pathology-OncoNPC concordance in 67 out of 129 cases  
1139 (51.9%), significantly higher than the top-3 concordance of randomly selected OncoNPC predictions  
1140 (19.9%, 95% C.I. 19.7% - 20.1%). Within the treatment-OncoNPC concordant group (n = 64), we  
1141 found the pathology-OncoNPC concordance in 53 out of 64 cases (82.8%, 95% C.I. 73.6% - 92.1%),  
1142 significantly higher than the concordance observed in the treatment-OncoNPC discordant group (n  
1143 = 65), which was only 14 out of 65 cases (21.5%, 95% C.I. 11.5% - 31.5%). It is worth noting  
1144 that the higher pathology-OncoNPC concordance in the treatment concordant group is expected  
1145 due to the definition of the group. Intriguingly, the 14 putatively concordant cases in the treatment

1146 discordant group are likely instances where a primary was suspected by pathology but did not factor  
1147 into the ultimate treatment decision. Overall, the relatively low overall concordance rate highlights  
1148 the difficulties in diagnosing highly metastatic or poorly differentiated tumors through pathology,  
1149 as previously mentioned in [2, 23].

1150 Next, we compared the level of uncertainty in OncoNPC predictions, measured by entropy,  
1151 in two groups of patients. The first group comprised patients with suspected primaries based on  
1152 pathology findings ( $n = 129$ ), while the second group consisted of patients with no suspected primary  
1153 site ( $n = 29$ ), indicating inconclusive pathology results and an additional degree of pathological  
1154 complexity. Interestingly, we found no significant difference in prediction uncertainty (0.770, 95%  
1155 C.I. 0.664 - 0.876 and 0.796, 95% C.I. 0.522 - 1.07 for those with and without pathology-based  
1156 suspected primaries, respectively; note higher means the prediction is less certain), suggesting that  
1157 tumors without IHC-based suspected primaries were not more challenging to classify genetically.  
1158 Additionally, we compared the prediction uncertainty between the pathology-OncoNPC discordant  
1159 and concordant groups ( $n = 62$  and  $n = 67$ , respectively), where CUP tumors were defined as  
1160 pathology-OncoNPC concordant if the OncoNPC prediction matched any of the top 3 suspected  
1161 primary sites (and discordant otherwise). The discordant group had significantly higher prediction  
1162 uncertainty (0.958, 95% C.I. 0.809 - 1.11 for the discordant group vs. 0.597, 95% C.I. 0.458 -  
1163 0.735 for the concordant group), indicating that discordant tumors were more challenging to classify  
1164 genetically.

1165 Finally, we conducted a retrospective investigation into the diagnostic utility of OncoNPC pre-  
1166 dictions for CUP tumors when multiple primaries are suspected based on pathology findings. We  
1167 present two case studies here:

1168 In one case, a patient had urothelial cancer years prior to presenting with an ampullary mass.  
1169 Based on initial pathological findings, it was initially thought to be an intestinal type ampullary  
1170 carcinoma and treated with first-line chemotherapy (FOLFOX regimen) per NCCN guidelines. How-  
1171 ever, further examination showed that the mass was more likely consistent with urothelial cancer,  
1172 and this was confirmed by the positive response to the NCCN-recommended first-line therapy for  
1173 locally advanced or metastatic bladder cancer (i.e., gemcitabine and cisplatin). OncoNPC predicted  
1174 Bladder Urothelial Carcinoma for this patient's tumor with a high prediction confidence of 0.999.

1175 In another case, a patient with a history of bilateral breast cancers presented with a lung lesion  
1176 of unknown primary. OncoNPC predicted Invasive Breast Carcinoma for this patient's tumor with  
1177 a confidence of 0.996, while pathology findings suggested possible recurrence of breast cancer, pri-  
1178 mary lung adenocarcinoma, or mesothelioma. The case was ultimately treated as lung cancer with  
1179 immunotherapy, but the patient had a poor response and passed away two months later, raising the  
1180 possibility of a primary breast cancer.

Table S2: Demographic details of patients with CUP in the concordant and discordant treatment groups, who *received their initial treatments after the results of the OncoPanel sequencing were available to clinicians*. The OncoNPC predicted cancer groups, except for the GI group, match the cancer groups defined in Main Table 1. The GI group in this analysis comprises the upper GI group, consisting of Cholangiocarcinoma (CHOL), Esophagogastric Adenocarcinoma (EGC), and Pancreatic Adenocarcinoma (PAAD), as well as Colorectal Adenocarcinoma (COADREAD).

|                                                          | Concordant treatment group<br>(n = 21) | Discordant treatment group<br>(n = 12) |
|----------------------------------------------------------|----------------------------------------|----------------------------------------|
| Sex; male-female ratio                                   | 0.429-0.571                            | 0.417-0.583                            |
| Age at sequencing (95% C.I.)                             | 65 (60.4 - 69.6)                       | 62 (57.3 - 66.7)                       |
| OncoNPC prediction uncertainty<br>(in entropy; 95% C.I.) | 0.517 (0.253 - 0.782)                  | 0.862 (0.484 - 1.24)                   |
| <b>OncoPanel version (proportion in %)</b>               |                                        |                                        |
| v1                                                       | 1 (4.762%)                             |                                        |
| v2                                                       | 2 (9.524%)                             | 1 (8.333%)                             |
| v3                                                       | 18 (85.714%)                           | 10 (83.333%)                           |
| Mutational burden (95% C.I.)                             | 0.029 (0.016 - 0.043)                  | 0.031 (0.02 - 0.042)                   |
| CNA burden (95% C.I.)                                    | 0.231 (0.175 - 0.286)                  | 0.256 (0.2 - 0.313)                    |
| <b>OncoNPC predicted cancer groups (proportion in %)</b> |                                        |                                        |
| Lung                                                     | 5 (23.81%)                             | 3 (25.0%)                              |
| Breast                                                   | 1 (4.762%)                             | 4 (33.333%)                            |
| GI                                                       | 3 (14.286%)                            |                                        |
| Gyn                                                      | 4 (19.048%)                            | 1 (8.333%)                             |
| Others                                                   | 8 (38.095%)                            | 4 (33.333%)                            |
| <b>Metastatic sites (proportion in %)</b>                |                                        |                                        |
| Brain                                                    | 2 (9.524%)                             | 2 (16.667%)                            |
| Bone                                                     | 3 (14.286%)                            |                                        |
| Soft tissue                                              |                                        | 1 (8.333%)                             |
| Others                                                   | 16 (76.19%)                            | 9 (75.0%)                              |
| <b>Histology (proportion in %)</b>                       |                                        |                                        |
| Adenocarcinoma                                           | 9 (42.857%)                            | 4 (33.333%)                            |
| Neuroendocrine                                           | 4 (19.048%)                            |                                        |
| Squamous cell                                            | 1 (4.762%)                             | 1 (8.333%)                             |
| Others                                                   | 7 (33.333%)                            | 7 (58.333%)                            |
| Treatment start date (95% C.I.)                          | 2018-10-26 (2018-3-5 - 2019-6-18)      | 2018-7-2 (2017-9-9 - 2019-4-24)        |

Table S3: Center-specific number of held-out CKP tumor samples, broken down by cancer types and prediction confidences (i.e.,  $p_{\max}$ ) thresholds.

|                                      |      | Minimum $p_{\max}$ threshold |      |      |      |
|--------------------------------------|------|------------------------------|------|------|------|
|                                      |      | 0.0                          | 0.5  | 0.7  | 0.9  |
| Overall                              | DFCI | 3690                         | 3438 | 3047 | 2502 |
|                                      | MSK  | 3331                         | 3012 | 2608 | 2112 |
|                                      | VICC | 268                          | 230  | 192  | 136  |
| Non-Small Cell Lung Cancer (NSCLC)   | DFCI | 811                          | 735  | 644  | 533  |
|                                      | MSK  | 717                          | 618  | 520  | 430  |
|                                      | VICC | 36                           | 27   | 23   | 19   |
| Invasive Breast Carcinoma (BRCA)     | DFCI | 600                          | 572  | 514  | 433  |
|                                      | MSK  | 727                          | 675  | 598  | 474  |
|                                      | VICC | 68                           | 62   | 48   | 35   |
| Colorectal Adenocarcinoma (COADREAD) | DFCI | 521                          | 502  | 479  | 436  |
|                                      | MSK  | 375                          | 358  | 330  | 303  |
|                                      | VICC | 55                           | 52   | 48   | 37   |
| Diffuse Glioma (DIFG)                | DFCI | 400                          | 390  | 383  | 361  |
|                                      | MSK  | 214                          | 204  | 187  | 168  |
|                                      | VICC | 11                           | 10   | 8    | 4    |
| Prostate Adenocarcinoma (PRAD)       | DFCI | 126                          | 118  | 98   | 67   |
|                                      | MSK  | 300                          | 280  | 233  | 163  |
|                                      | VICC | 16                           | 10   | 6    | 3    |
| Pancreatic Adenocarcinoma (PAAD)     | DFCI | 136                          | 125  | 104  | 71   |
|                                      | MSK  | 233                          | 216  | 187  | 154  |
|                                      | VICC | 10                           | 8    | 6    | 1    |
| Ovarian Epithelial Tumor (OVT)       | DFCI | 257                          | 229  | 184  | 112  |
|                                      | MSK  | 100                          | 60   | 38   | 10   |
|                                      | VICC | 12                           | 9    | 5    | 2    |
| Esophagogastric Adenocarcinoma (EGC) | DFCI | 171                          | 153  | 114  | 66   |
|                                      | MSK  | 82                           | 70   | 44   | 24   |
|                                      | VICC | 11                           | 8    | 7    | 2    |
| Endometrial Carcinoma (UCEC)         | DFCI | 123                          | 116  | 95   | 73   |
|                                      | MSK  | 105                          | 100  | 91   | 70   |
|                                      | VICC | 7                            | 6    | 6    | 2    |
| Melanoma (MEL)                       | DFCI | 134                          | 127  | 115  | 103  |
|                                      | MSK  | 108                          | 103  | 98   | 92   |
|                                      | VICC | 24                           | 24   | 23   | 23   |
| Bladder Urothelial Carcinoma (BLCA)  | DFCI | 86                           | 81   | 67   | 52   |
|                                      | MSK  | 93                           | 84   | 78   | 65   |
|                                      | VICC | 4                            | 4    | 4    | 3    |

  

|                                                |      | Minimum $p_{\max}$ threshold |     |     |     |
|------------------------------------------------|------|------------------------------|-----|-----|-----|
|                                                |      | 0.0                          | 0.5 | 0.7 | 0.9 |
| Renal Cell Carcinoma (RCC)                     | DFCI | 79                           | 71  | 61  | 50  |
|                                                | MSK  | 85                           | 75  | 68  | 56  |
|                                                | VICC | 6                            | 5   | 4   | 3   |
| Head and Neck Squamous Cell Carcinoma (HNSCC)  | DFCI | 55                           | 50  | 39  | 28  |
|                                                | MSK  | 27                           | 18  | 12  | 5   |
|                                                | VICC | .                            | .   | .   | .   |
| Cholangiocarcinoma (CHOL)                      | DFCI | 18                           | 12  | 10  | 7   |
|                                                | MSK  | 40                           | 31  | 24  | 16  |
|                                                | VICC | 1                            | .   | .   | .   |
| Gastrointestinal Stromal Tumor (GIST)          | DFCI | 47                           | 46  | 43  | 40  |
|                                                | MSK  | 34                           | 33  | 31  | 30  |
|                                                | VICC | .                            | .   | .   | .   |
| Well-Differentiated Thyroid Cancer (WDTC)      | DFCI | 17                           | 15  | 14  | 9   |
|                                                | MSK  | 31                           | 31  | 29  | 25  |
|                                                | VICC | 1                            | 1   | 1   | .   |
| Pleural Mesothelioma (PLMESO)                  | DFCI | 24                           | 21  | 14  | 10  |
|                                                | MSK  | 18                           | 17  | 10  | 6   |
|                                                | VICC | 5                            | 3   | 2   | 1   |
| Meningothelial Tumor (MNGT)                    | DFCI | 27                           | 25  | 23  | 20  |
|                                                | MSK  | 3                            | 3   | 1   | .   |
|                                                | VICC | 1                            | 1   | 1   | 1   |
| Gastrointestinal Neuroendocrine Tumors (GINET) | DFCI | 20                           | 17  | 16  | 11  |
|                                                | MSK  | 3                            | 3   | 2   | .   |
|                                                | VICC | .                            | .   | .   | .   |
| Pancreatic Neuroendocrine Tumor (PANET)        | DFCI | 15                           | 14  | 13  | 8   |
|                                                | MSK  | 24                           | 22  | 19  | 15  |
|                                                | VICC | .                            | .   | .   | .   |
| Acute Myeloid Leukemia (AML)                   | DFCI | 15                           | 11  | 10  | 6   |
|                                                | MSK  | .                            | .   | .   | .   |
|                                                | VICC | .                            | .   | .   | .   |
| Non-Hodgkin Lymphoma (NHL)                     | DFCI | 8                            | 8   | 7   | 6   |
|                                                | MSK  | 12                           | 11  | 8   | 6   |
|                                                | VICC | .                            | .   | .   | .   |

## References

- 1181
- 1182 [1] K. Oien and J. Dennis, “Diagnostic work-up of carcinoma of unknown primary: From immuno-  
1183 histochemistry to molecular profiling,” *Annals of Oncology*, vol. 23, pp. x271–x277, 2012.
- 1184 [2] G. R. Varadhachary and M. N. Raber, “Cancer of unknown primary site,” *New England Journal*  
1185 *of Medicine*, vol. 371, no. 8, pp. 757–765, 2014.
- 1186 [3] E. Shadmi, N. Flaks-Manov, M. Hoshen, O. Goldman, H. Bitterman, and R. D. Balicer, “Pre-  
1187 dicting 30-day readmissions with preadmission electronic health record data,” *Medical care*,  
1188 vol. 53, no. 3, pp. 283–289, 2015.
- 1189 [4] E. Özyılmaz *et al.*, “Worse pre-admission quality of life is a strong predictor of mortality in  
1190 critically ill patients,” *Turkish Journal of Physical Medicine and Rehabilitation*, vol. 68, no. 1,  
1191 p. 19, 2022.
- 1192 [5] D. A. Vyas, L. G. Eisenstein, and D. S. Jones, *Hidden in plain sight—reconsidering the use of*  
1193 *race correction in clinical algorithms*, 2020.
- 1194 [6] S. M. Lundberg *et al.*, “From local explanations to global understanding with explainable ai  
1195 for trees,” *Nature machine intelligence*, vol. 2, no. 1, pp. 56–67, 2020.
- 1196 [7] R. W. Davies, J. Flint, S. Myers, and R. Mott, “Rapid genotype imputation from sequence  
1197 without reference panels,” *Nature genetics*, vol. 48, no. 8, pp. 965–969, 2016.
- 1198 [8] A. Gusev, S. Groha, K. Taraszka, Y. R. Semenov, and N. Zaitlen, “Constructing germline  
1199 research cohorts from the discarded reads of clinical tumor sequences,” *Genome medicine*,  
1200 vol. 13, pp. 1–14, 2021.
- 1201 [9] B. K. Bulik-Sullivan *et al.*, “Ld score regression distinguishes confounding from polygenicity  
1202 in genome-wide association studies,” *Nature genetics*, vol. 47, no. 3, pp. 291–295, 2015.
- 1203 [10] E. L. Kaplan and P. Meier, “Nonparametric estimation from incomplete observations,” *Journal*  
1204 *of the American statistical association*, vol. 53, no. 282, pp. 457–481, 1958.
- 1205 [11] A. M. Conway, C. Mitchell, E. Kilgour, G. Brady, C. Dive, and N. Cook, “Br J CancerMolecular  
1206 characterisation and liquid biomarkers in Carcinoma of Unknown Primary (CUP): taking the  
1207 ‘U’ out of ‘CUP’,” *Br J Cancer*, vol. 120, no. 2, pp. 141–153, Jan. 2019.
- 1208 [12] D. R. Cox, “Regression models and life-tables,” *Journal of the Royal Statistical Society: Series*  
1209 *B (Methodological)*, vol. 34, no. 2, pp. 187–202, 1972.
- 1210 [13] C. Davidson-Pilon, “Lifelines: Survival analysis in python,” *Journal of Open Source Software*,  
1211 vol. 4, no. 40, p. 1317, 2019.
- 1212 [14] A. J. Schoenfeld *et al.*, “The genomic landscape of smarca4 alterations and associations with  
1213 outcomes in patients with lung cancersmarca4 alterations in lung cancer,” *Clinical Cancer*  
1214 *Research*, vol. 26, no. 21, pp. 5701–5708, 2020.
- 1215 [15] S. Papillon-Cavanagh, P. Doshi, R. Dobrin, J. Szustakowski, and A. M. Walsh, “Stk11 and  
1216 keap1 mutations as prognostic biomarkers in an observational real-world lung adenocarcinoma  
1217 cohort,” *ESMO open*, vol. 5, no. 2, e000706, 2020.

- 1218 [16] T. Takahashi *et al.*, “Mutations in *keap1* are a potential prognostic factor in resected non-small  
1219 cell lung cancer,” *Journal of surgical oncology*, vol. 101, no. 6, pp. 500–506, 2010.
- 1220 [17] T. Berghmans *et al.*, “Thyroid transcription factor 1—a new prognostic factor in lung cancer:  
1221 A meta-analysis,” *Annals of oncology*, vol. 17, no. 11, pp. 1673–1676, 2006.
- 1222 [18] J. G. Tate *et al.*, “Cosmic: The catalogue of somatic mutations in cancer,” *Nucleic acids*  
1223 *research*, vol. 47, no. D1, pp. D941–D947, 2019.
- 1224 [19] K. Fizazi, F. Greco, N. Pavlidis, G. Daugaard, K. Oien, and G. Pentheroudakis, “Cancers of  
1225 unknown primary site: Esmo clinical practice guidelines for diagnosis, treatment and follow-  
1226 up,” *Annals of Oncology*, vol. 26, pp. v133–v138, 2015.
- 1227 [20] D. Chakravarty *et al.*, “Oncokb: A precision oncology knowledge base,” *JCO precision oncology*,  
1228 vol. 1, pp. 1–16, 2017.
- 1229 [21] A. Posner *et al.*, “A comparison of dna sequencing and gene expression profiling to assist tissue  
1230 of origin diagnosis in cancer of unknown primary,” *The Journal of Pathology*, vol. 259, no. 1,  
1231 pp. 81–92, 2023.
- 1232 [22] W. Jiao *et al.*, “A deep learning system accurately classifies primary and metastatic cancers  
1233 using passenger mutation patterns,” *Nature communications*, vol. 11, no. 1, p. 728, 2020.
- 1234 [23] G. G. Anderson and L. M. Weiss, “Determining tissue of origin for metastatic cancers: Meta-  
1235 analysis and literature review of immunohistochemistry performance,” *Applied Immunohisto-*  
1236 *chemistry & Molecular Morphology*, vol. 18, no. 1, pp. 3–8, 2010.
